1 **Incidence of mortality and its predictors among adult Visceral Leishmaniasis patients at**  
2 **University of Gondar Comprehensive Specialized Hospital, Ethiopia**

3 <sup>1</sup>Yigizie Yeshaw\*, <sup>2</sup>Adino Tesfahun Tsegaye, <sup>3</sup>Solomon Gedlu Nigatu

4

5 <sup>1,2,3</sup>Department of Epidemiology and Biostatistics, Institute of Public Health, College of  
6 Medicine and Health Science, University of Gondar, Gondar, Ethiopia.

7 **Abstract**

---

8 **Background:** Visceral leishmaniasis (VL) is a neglected tropical disease resulting in a huge  
9 burden of mortality and impact on development of a country. Even though anti-leishmanial  
10 drugs reduce the incidence of mortality among VL patients, still there is a death of VL patients  
11 while on treatment. However, study on incidence of mortality and its predictors among these  
12 patients while on treatment is scarce in Ethiopia.

13 **Objective:** The aim of this study was to determine incidence of mortality and its predictors  
14 among adult VL patients at University of Gondar Hospital.

15 **Methods:** Institution based retrospective follow up study was conducted from 2013 to 2018 at  
16 University of Gondar Hospital. Data were collected from patients' chart and analyzed using  
17 Stata 14. Kaplan Meier failure curve and Log Rank test was used to compare survival  
18 probability of patients with categorical variables. Multivariable stratified Cox model was used  
19 to identify predictors of mortality among VL patients.  $P \leq 0.05$  was employed to declare  
20 statistically significant factors. Adjusted Hazard Ratio (AHR) and its 95% confidence interval  
21 (95% CI) was estimated for potential risk factors included in the multivariable model.

22 **Results:** A total of 586 VL patients were included in the study. The median age of patients was  
23 23 years. The incidence of mortality was 6.6 (95% CI: 5.2 - 8.4) per 1000 person-days of

24 observation. Independent predictors of mortality were: presence of comorbidity (AHR=2.29 (  
25 95% CI: 1.27-4.11)), relapse VL (AHR=3.03 (95% CI: 1.25-7.35)), toxicity of treatment drug  
26 (AHR=5.87( 95% CI:3.30-10.44)), nasal bleeding (AHR=2.58 ( 95%CI: 1.48-4.51)), jaundice  
27 (AHR=2.84 (95% CI: 1.57-5.16)) and being bedridden (AHR=3.26 (95 % CI: 1.86-5.73)).

28 **Conclusion:** The incidence of mortality among VL patients was high. Mortality was higher  
29 among VL patients with concomitant disease, relapse, toxicity during treatment, nasal  
30 bleeding, jaundice, and bedridden patients. Therefore, strict follow up and treatment of VL  
31 patients who have comorbidity, relapse VL, toxicity, nasal bleeding and jaundice were crucial  
32 so as to reduce the risk of mortality.

33 **Keywords:** Mortality, visceral leishmaniasis, predictors, Ethiopia

---

34 \*Correspondence: [yigizieyeshaw29@gmail.com](mailto:yigizieyeshaw29@gmail.com)

### 35 **Authors' summary**

36 Visceral leishmaniasis is a neglected tropical disease caused by a protozoa parasite. Over 90%  
37 of global burden of VL occurs in poor rural and suburban areas in seven countries including  
38 our country, Ethiopia. If not appropriately treated, over 95% of VL cases will eventually die.  
39 The emergence of VL in Ethiopia places a huge burden on society as it affects poor, young and  
40 productive age group of its population. However, there is scarcity of data about incidence of  
41 mortality and its predictors among adult VL patients in Ethiopia.

42 In this study, a registry of VL patients at Gondar University Hospital was taken to determine  
43 the incidence of VL mortality and its predictors. Mortality rate was higher among VL patients  
44 with concomitant disease, relapse, drug toxicity, nasal bleeding and jaundice. Therefore, strict  
45 follow up and treatment of VL patients who had comorbidity, relapse VL, drug toxicity, nasal  
46 bleeding and jaundice were crucial.

47

## 48 **Introduction**

49 Visceral leishmaniasis (kal-azar) is a neglected tropical disease caused by a protozoa parasite  
50 called *Leishmania donovani* complex (*L. donovani* and *L. infantum*), which is transmitted by  
51 the female phlebotomine sand flies. It is characterized by prolonged fever, weight loss,  
52 decreased appetite, anemia, and hepatosplenomegaly[1–3].

53 Globally about 500,000 new cases of visceral leishmaniasis (VL) occur every year. Of these,  
54 over 90% of global burden of VL occurs in poor rural and suburban areas in seven countries:  
55 Bangladesh, Brazil, Ethiopia, India, Nepal, Sudan and South Sudan[2,4].

56 From Eastern Africa region, Sudan is the most affected country, followed by Ethiopia, Kenya,  
57 Somalia and Uganda[5]. According to a study in eastern Uganda, mortality rate among VL  
58 patients is 3.7% [6].

59 When we came to Ethiopia, mortality rate among severely ill adult VL patients is 4.8 % [7]  
60 and it is 14 % among VL-HIV co-infected adults [8]. Another two cross sectional studies shoes  
61 that the proportion of death among VL patients is 12.4% in Kabsay Abera Hospital [9] and  
62 18.5% in Tigray region [10].

63 Visceral leishmaniasis is associated with about 2,357,000 disability-adjusted life years  
64 (DALYs), placing leishmaniasis ninth in a global analysis of infectious diseases [3,11]. If not  
65 appropriately treated, over 95% of VL cases will eventually die, resulting in at least 50,000  
66 deaths per year worldwide, a rate surpassed among parasitic diseases only by malaria [12]. In  
67 recent years, more effective treatments have reduced the case fatality rate to 10% on average,  
68 which is equivalent to a fatality rate of 20,000 – 40,000 deaths[13].

69 The emergence of VL in Ethiopia places a huge burden on society in terms of mortality, and  
70 impact on country's economy as well as future development. This is because the disease is  
71 more prevalent in Kola to Weina Dega agro-ecological zones of Ethiopia, areas of major  
72 agricultural projects such as dams for electricity and irrigation purposes as well as other  
73 agricultural activities all exist [14].

74 Predictors of mortality among VL patients include: presence of drug toxicity [15], malnutrition  
75 [3,16,17], VL-HIV co-infection [5,9,17–24], thrombocytopenia [5,11,18–21,25], leukopenia  
76 [5,18–21,26], jaundice [5,18–21,26], relapsing course of the disease [11,22,25], high parasite  
77 load [8,27,28], renal failure(creatinine>1.5 mg/dl)[20,26], diarrhea [10,11,25], bleeding  
78 [5,10,18–21], anemia [11,17,25], inability to walk at admission [9], longer duration of illness  
79 [17], concomitant disease [5,18–21], late diagnosis [6,9,29] and edema [5,18–21].

80 Even though visceral leishmaniasis has become one of the leading health problem in Ethiopia  
81 as it causes high mortality rate and reduced productivity by affecting a significant portion of  
82 poor, rural, and productive age group of the country [30], there is scarcity of data about  
83 incidence of mortality and its predictors among adult VL patients. Hence, considering VL  
84 severity and lethality rate as well as its impact on a country, early identification of factors  
85 associated with mortality among VL patients is relevant to the premature establishment of  
86 appropriate measures. Therefore, the objective of this study is to determine incidence of  
87 mortality and its predictors among adult VL patients who were on treatment at University of  
88 Gondar Comprehensive Specialized Hospital from 2013 to 2018.

89

90

## 91 **Methods**

### 92 **Study area and period**

93 This study was conducted at University of Gondar Comprehensive Specialized Hospital, Kal-  
94 azar ward from January 1, 2013 to December 30, 2018.

95 University of Gondar Hospital is located 727 km far from the capital city, Addis Ababa in  
96 northwest direction. It serves for a population of five million across the region.

97 The Hospital has Leishmaniasis Research and Treatment Center (LRTC), which was  
98 established in 2004 in collaboration with Drugs for Neglected Diseases initiatives (DNDi). In  
99 this center, several clinical trials have been conducted. The staff at LRTC are trained and  
100 experienced in good clinical practice to treat all forms of leishmaniasis. Visceral leishmaniasis  
101 suspected patients are referred from the different units of the Hospital and from other health  
102 facilities of the catchment area. Patients admitted for VL treatment in LRTC are routinely  
103 evaluated and the findings are documented in their chart records. The LRTC currently serves  
104 for more than 300 VL patients per year[7].

### 105 **Study design**

106 Institution based retrospective follow up study was employed.

### 107 **Source and study population**

108 All adult VL patients who were treated with anti-leishmanial drugs at University of Gondar  
109 Hospital were the source population and all adult VL patients who were treated with anti-  
110 leishmaniasis drug from 2013 to 2018 were the study population.

### 111 **Inclusion and exclusion criteria**

112 All adult VL patients who were treated with anti-leishmaniasis drug from Jan 2013 to Dec  
113 2018. Patients with unknown treatment outcome, no recorded date of treatment initiation and

114 treatment outcome were excluded.

### 115 **Sample size and sampling procedure**

116 The sample size for this study was calculated through Stata 14 software using 12.4 %  
117 probability of an event (death) in another similar setting [9], 80 % power, hazard ratio of two,  
118 5% significance level, and 10 % for incomplete data. Accordingly, the final sample size of the  
119 study was 586. Simple random sampling technique was used to select these sample patients’  
120 charts from total of 1899 patients that had been on treatment from 2013 to 2018.

### 121 **Study variables**

122 The dependent variable for this study was time until death of the patient. Independent variables  
123 include socio-demographic variables (age, sex, residence, migration status), clinical and  
124 laboratory related variables such as visceral leishmaniasis parasite load, leukopenia,  
125 thrombocytopenia, hemoglobin level, treatment type, toxicity during treatment, late diagnosis,  
126 VL episode, concomitant disease, condition of patient at admission, creatinine level, diarrhea,  
127 jaundice, BMI, nasal bleeding and edema.

### 128 **Operational definitions**

129 **Event (Death):** any documented death of VL patient while taking the treatment during follow  
130 up period.

131 **Censored:** Patients who were transferred out, treatment failure or loss to follow up or became  
132 initial cured.

133 **Initial cure:** declared when a patient shows an improvement of signs and symptoms at the end  
134 of treatment depending on the category of treatment (after 12 days for those patients taking  
135 ambisome, 17 days for those patients taking a combination of SSG and PM, and 28 days for  
136 those patients taking SSG only) such as fever resolution, hemoglobin increase, weight gain and

137 spleen size regression), and/or has a negative parasitological test of cure (TOC).

138 **Treatment failure:** defined as a positive TOC (parasitological failure) and/or persisting  
139 clinical signs/symptoms at the end of treatment or failure to continue first-line treatment for  
140 safety reasons.

141 **Loss to follow up:** A patient who started VL treatment but interrupted treatment due to the  
142 patient leaving the Hospital during the study period [9,15,31].

143 **Primary VL case:** a patient who is diagnosed with visceral Leishmaniasis for the first time in  
144 which diagnosis relies on a positive serological test for VL (rK39 based rapid test and/or DAT  
145 direct agglutination test) and/or a positive parasitological test (microscopic detection of  
146 Leishmania parasites in splenic aspirate).

147 **Relapse VL:** a patient with a history of previous VL and discharged improved or with a  
148 negative test of cure (TOC) after treatment and who then presents with symptoms of VL after  
149 four weeks of initial VL treatment and is parasitologically confirmed and documented as  
150 relapse VL[32].

151 **High parasite load** is parasite load grade of more than 4+ (1–10 parasites per field). Low  
152 parasite load is parasite load grade of less than or equal to 3(1–10 parasites per 10-1000 fields).

153 **Concomitant disease:** presence of one or more of a documented case of the following  
154 diseases: tuberculosis, pneumonia, malaria and HIV.

155 **Toxicity during treatment:** presence of one or more of documented toxicity such as cardiac  
156 arrest, pancreatitis, jaundice (liver disease) and kidney failure [20].

#### 157 **Data collection procedure and tools**

158 Data were collected from VL patient charts who were registered from 2013 to 2018 using  
159 pretested and structured data extraction checklist.

160 Based on the pretest finding, amendments and arrangements were made on the data extraction  
161 checklist. Four BSc Nurse data collectors were recruited and trained for half day about ways  
162 of extracting data from patient charts. Clinical and laboratory parameters: such as parasite load,  
163 leukopenia, thrombocytopenia, hemoglobin level, treatment type, late diagnosis, VL episode,  
164 concomitant disease, general condition of patient at admission, diarrhea, jaundice, BMI, nasal  
165 bleeding, edema, and creatinine level were extracted at admission. The presence of toxicity  
166 during treatment was also assessed. The presence or absence those abnormalities was decided  
167 based on the documentation made by the physicians. Laboratory results were also collected at  
168 admission and their value was compared with their reference value to decide on the presence  
169 of derangement on these parameters. Patients were followed retrospectively for 12 to 28 days  
170 according to their treatment category.

#### 171 **Data quality management**

172 To assure the data quality, high emphasis was given in designing data collection instrument.  
173 Training was given for data collectors to create a common understanding of the data extraction  
174 checklist and patient chart as well as registry reviewing skills. The data extraction checklist  
175 was pre-tested. Throughout the course of the data collection, data collectors were supervised  
176 by the principal investigator.

#### 177 **Data analysis procedure**

178 Data were checked on a daily basis for completeness, clarity and accuracy. Data were entered  
179 into Epi-data version 3.1 and exported to Stata 14 for analysis. Descriptive measures such as  
180 frequency of each categorical variable was calculated.

181 Time to event data (survival times in days) was calculated by subtracting date of treatment ( $t_0$ )  
182 started from date of event occurred ( $t_1$ ). Death was the outcome variable (event) that was



183 measured (coded as 1 for death and 0 for censored). Person-days of observation (PDO) were  
184 calculated from the date of starting anti-leishmanial treatment to date of death or censored. The  
185 failure probability of patients during VL treatment with respect to socio-demographic and  
186 clinical variables was described with the Kaplan Meier (KM) curve. Log-rank test was also  
187 used to test the failure differences among categories of each independent variable.

188 Schoenfeld residuals test (both global and scaled) and graphical methods were used to check  
189 the Cox proportional hazard assumption. Model adequacy was also checked using Cox Snell  
190 residuals.

191 Multivariable stratified Cox model was used to identify predictors of mortality among VL  
192 patients. All variables with a p-value of  $< 0.2$  at bi-variable analysis were entered into the final  
193 model. P-Value  $\leq 0.05$  was employed to declare the statistically significant variables. Adjusted  
194 hazard ratio (AHR) and its corresponding 95% confidence interval (95% CI) were estimated  
195 for potential risk factors included in the multivariable stratified Cox model.

#### 196 **Ethical consideration**

197 Ethical clearance was obtained from Institutional Review Board of Institute of Public Health,  
198 University of Gondar (Reference number IPH/180/06/2011). Written permission letter for  
199 reviewing extracting data from patient's chart was also obtained from University of Gondar  
200 Comprehensive Specialized Hospital. Privacy and confidentiality of information was kept  
201 properly and names of patients as well as other personal identifiers were not recorded.

202

203 **Results**

204 **Sociodemographic and baseline clinical characteristics of VL patients**

205 A total of 586 visceral leishmaniasis patients were included in the study. Almost all,  
206 584(99.7%) of them were males. The median age of patients was 23 years with interquartile  
207 range of 20 to 28 years. Most of the patients, 470 (80.2%) were migrant workers.

208 Majority of VL patients, 561(95.7%) had primary visceral leishmaniasis. From a total of 586  
209 patients, 169 (28.8 %) of them had concomitant disease at admission. Of these, about half of  
210 them had pneumonia (49.7%). Sixty- seven (11.4 %) of them had high parasite load. Forty-  
211 one (7.0%) of study participants had toxicity during treatment. Of these, 15(36.6 %) of them  
212 had cardiac arrest followed by pancreatitis, 10(24.4 %). Regarding duration of illness,  
213 258(44%) of them had more than 30 days of illness duration at admission (**Table 1**).

214 **Table 1:** socio-demographic and baseline clinical characteristics of VL patients at University  
215 of Gondar Hospital, 2019(n=586)

| Variables        | Frequency | Percentage |
|------------------|-----------|------------|
| Sex              |           |            |
| Male             | 584       | 99.7       |
| Female           | 2         | 0.3        |
| Migration status |           |            |
| Migrant worker   | 470       | 80.2       |
| Resident         | 116       | 19.8       |
| VL type          |           |            |
| Primary VL       | 561       | 95.7       |
| Relapse VL       | 25        | 4.3        |

---

|                                  |     |      |
|----------------------------------|-----|------|
| Toxicity during treatment        |     |      |
| No                               | 545 | 93.0 |
| Yes                              | 41  | 7.0  |
| Concomitant disease at admission |     |      |
| No                               | 417 | 71.2 |
| Yes                              | 169 | 28.8 |
| Diarrhea at admission            |     |      |
| No                               | 535 | 91.3 |
| Yes                              | 51  | 8.7  |
| Nasal bleeding                   |     |      |
| No                               | 497 | 84.8 |
| Yes                              | 89  | 15.2 |
| Jaundice                         |     |      |
| No                               | 505 | 86.2 |
| Yes                              | 81  | 13.8 |
| Duration of illness              |     |      |
| ≤ 30 days                        | 328 | 56.0 |
| >30 days                         | 258 | 44.0 |
| Leukopenia                       |     |      |
| No                               | 50  | 8.5  |
| Yes                              | 536 | 91.5 |
| Thrombocytopenia                 |     |      |
| No                               | 86  | 14.7 |

---

---

|                                     |     |      |
|-------------------------------------|-----|------|
| Yes                                 | 500 | 85.3 |
| Condition of patient at admission   |     |      |
| Ambulatory                          | 483 | 82.4 |
| Bedridden                           | 103 | 17.6 |
| Parasite load                       |     |      |
| Low                                 | 519 | 88.6 |
| High                                | 67  | 11.4 |
| Treatment type                      |     |      |
| Sodium stibogluconate               | 83  | 14.2 |
| Sodium stibogluconate & Paromomycin | 425 | 72.5 |
| Ambisome                            | 78  | 13.3 |

---

216

217 **Incidence of mortality among VL patients**

218 From the total of 586 VL patients who start anti-leishmanial treatment during the study period,  
219 65 (11.09 %) of them were died, 483(82.4 %) cured, 26(4.4%) lost to follow up, 9(1.5%)  
220 treatment failure, and the rest, 3 (0.5%) were transferred out. The total cohort contributed 9830  
221 person-days, resulting in the overall mortality rate of 6.6 deaths (95% CI: 5.2 - 8.4) per 1000  
222 person-days of observation. Of the 65 deaths, 39 (60%) of them occurred within the first 10  
223 days of treatment initiation, which is equivalent to a mortality rate of 6.9 deaths per 1000  
224 person-days of observation. The cumulative failure probability of VL patients at the end of  
225 follow up period was 0.193 (**Figure 1**).

226

## 227 **Comparison of failure functions**

228 Kaplan Meier failure curve was used to compare death probability among categories of each  
229 independent variable visually. Log-rank test was also used to objectively judge the presence or  
230 absence of a difference in death probabilities among different categories of each independent  
231 variable. Accordingly, Kaplan Meier failure curve was done for all possible predictors. For  
232 instance, relapse VL patients had shorter survival experience than primary VL cases. This  
233 visually observed difference was also statistically significant (Log rank,  $p < 0.001$ ). Visceral  
234 leishmaniasis patients who had comorbidity at admission had shorter survival experience than  
235 those VL patients without comorbidity (Log rank,  $p < 0.001$ ). VL patient who had jaundice at  
236 admission had shorter survival experience than those VL patients without jaundice (Log rank,  
237  $p < 0.001$ ) (**Figure 2**).

## 238 **Assessing Proportional Hazard Assumption**

239 Proportional hazard assumption was checked both graphically and Schoenfeld residuals test  
240 (global and scaled) for all possible predictors of mortality. Just to show for some of the  
241 variables  $-\ln(-\ln(\text{survival probability}))$  to  $\ln(\text{analysis time})$  for jaundice, comorbidity and  
242 residence was demonstrated graphically. Accordingly, the hazards do not cross between  
243 categories of jaundice and comorbidity, which means that the proportional hazard assumption  
244 was satisfied for these variables. However, it crosses between categories of residence, which  
245 means that proportional hazard assumption was not satisfied for residence (**Figure 3**).

246 Moreover, in order to test proportional hazard assumption objectively, Schoenfeld residuals  
247 test (global and scaled) was done. Accordingly, all variables with the exception of residence  
248 satisfies proportional hazard assumption ( $p > 0.05$ ) (**Table 2**).

249

250 **Table 2:** Proportional hazard assumption test for the study on incidence of mortality and its  
251 determinants among VL patients at UoG Hospital, 2019

| Variables                      | rho      | Chi2  | df | Prob>chi2 |
|--------------------------------|----------|-------|----|-----------|
| Residence                      | -0.29213 | 6,20  | 1  | 0.0127    |
| Edema                          | -0.19109 | 2.73  | 1  | 0.0983    |
| Diarrhea                       | 0.06225  | 0.28  | 1  | 0.5940    |
| Comorbidity                    | 0.16637  | 2.29  | 1  | 0.1305    |
| VL episode                     | -0.15490 | 1.77  | 1  | 0.1831    |
| Toxicity                       | -0.01293 | 0.01  | 1  | 0.9055    |
| Hemoglobin                     | -0.10120 | 0.78  | 1  | 0.3781    |
| Nasal bleeding                 | 0.06777  | 0.38  | 1  | 0.5398    |
| Jaundice                       | -0.05067 | 0.19  | 1  | 0.6626    |
| Illness duration               | 0.14165  | 1.61  | 1  | 0.2039    |
| Patient condition at admission | -0.11546 | 1.22  | 1  | 0.2688    |
| Parasite level                 | 0.13763  | 1.63  | 1  | 0.2011    |
| Creatinine level               | 0.02843  | 0.06  | 1  | 0.8060    |
| Treatment type                 | 0.04827  | 0.17  | 1  | 0.6793    |
| Global test                    |          | 15.30 | 14 | 0.4299    |

252

### 253 **Determinants of mortality among VL patients**

254 Variables with  $p < 0.2$  on bivariable analysis were entered to multivariable stratified Cox model  
255 and six variables were found to be an independent predictor's of mortality among VL patients  
256 while on treatment ( $p \leq 0.05$ ). These include: concomitant disease, episode of visceral

257 leishmaniasis, toxicity during treatment, nasal bleeding, jaundice, and patient condition at  
258 admission.

259 The hazard of death among relapse VL patients was 3 (AHR=3.03(95%CI: 1.25-7.35)) times  
260 higher than primary VL patients. The risk of death was 5.9 (AHR=5.87(95%CI: 3.30-10.44))  
261 times higher among patients who had toxicity during treatment as compared to those patients  
262 who didn't have toxicity. The hazard of death among VL patients with comorbidity was 2.3  
263 (AHR=2.29(95% CI: 1.27-4.11)) times higher than those who didn't have. The hazard of death  
264 among VL patients who had nasal bleeding was 2.6 (AHR=2.58(95%CI: 1.48-4.51)) times  
265 higher than those patients who didn't have nasal bleeding. Visceral leishmaniasis patients who  
266 had jaundice at admission were 2.8 (AHR=2.84(95%CI: 1.57-5.16)) times more at risk of death  
267 than their counterparts. Those patients who were bedridden had 3.3 (AHR=3.26(95%CI: 1.86-  
268 5.73)) times increased risk of death compared to ambulatory patients (**Table 3**).

269

270 **Table 3:** Multivariable stratified Cox regression analysis for incidence of mortality among VL  
 271 patients at UoG Hospital Gondar, 2019.

| Variables        | Death      |           | Hazard Ratio (95 % CI) |                   |
|------------------|------------|-----------|------------------------|-------------------|
|                  | No         | Yes       | CHR                    | AHR               |
|                  | N (%)      | N (%)     |                        |                   |
| Age              |            |           | 1.04(1.01-1.07)        | 0.99 (0.95- 1.04) |
| VL type          |            |           |                        |                   |
| Primary VL       | 504 (89.8) | 57(10.2)  | 1                      | 1                 |
| Relapse VL       | 17(68)     | 8(32)     | 3.98(1.89- 8.36)       | 3.03(1.25-7.35)*  |
| Hemoglobin       |            |           |                        |                   |
| 0-7.9 mg/dl      | 218(85.5)  | 37(14.5)  | 1.59(0.71- 3.57)       | 1.42(0.59-3.42)   |
| 8-10.9 mg/dl     | 232(91.7)  | 21(8.3)   | 0.87(0.37-2.05)        | 1.06(0.42-2.56)   |
| ≥11 mg/dl        | 71(91.0)   | 7(8.9)    | 1                      | 1                 |
| Illness duration |            |           |                        |                   |
| ≤30 days         | 300(91.5)  | 28(8.5)   | 1                      | 1                 |
| >30 days         | 221(85.7)  | 37(14.3)  | 1.64(1.01-2.69)        | 0.92(0.51-1.64)   |
| Rx toxicity      |            |           |                        |                   |
| No               | 507(93)    | 38(7)     | 1                      | 1                 |
| Yes              | 14(34.1)   | 27 (65.9) | 13.99(8.48-23.10)      | 5.87(3.3-10.44)*  |
| Comorbidity      |            |           |                        |                   |
| No               | 395(94.7)  | 22(5.3)   | 1                      | 1                 |
| Yes              | 126(74.6)  | 43(25.4)  | 5.57(3.33- 9.32)       | 2.29(1.27-4.11)*  |
| Diarrhea         |            |           |                        |                   |



|                      |            |           |                   |                  |
|----------------------|------------|-----------|-------------------|------------------|
| No                   | 482(90.1)  | 53(9.9)   | 1                 | 1                |
| Yes                  | 39(76.5)   | 12(23.5)  | 2.61(1.39- 4.89)  | 1.73(0.88-3.78)  |
| Nasal bleeding       |            |           |                   |                  |
| No                   | 459(92.3)  | 38(7.7)   | 1                 | 1                |
| Yes                  | 62(69.7)   | 27(30.3)  | 4.51(2.75- 7.39)  | 2.58(1.48-4.51)* |
| Edema                |            |           |                   |                  |
| No                   | 443(90.8)  | 45(9.2)   | 1                 | 1                |
| Yes                  | 78(79.6)   | 20(20.4)  | 2.34(1.38 -3.97)  | 1.45(0.78-2.66)  |
| Jaundice             |            |           |                   |                  |
| No                   | 465 (92.0) | 40(8.0)   | 1                 | 1                |
| Yes                  | 56(69.1)   | 25( 30.9) | 4.62(2.79- 7.62)  | 2.84(1.57-5.16)* |
| Creatinine level     |            |           |                   |                  |
| <1.5 mg/dl           | 455(91.0)  | 45(9.0)   | 1                 | 1                |
| ≥1.5mg/dl            | 66(76.7)   | 20(27.3)  | 2.88(1.70- 4.88)  | 1.33(0.70-2.54)  |
| Condition of patient |            |           |                   |                  |
| Ambulatory           | 456(94.4)  | 27(5.6)   | 1                 | 1                |
| Bedridden            | 65(63.1)   | 38(36.9)  | 8.29(5.05- 13.59) | 3.26(1.86-5.73)* |
| Parasite load        |            |           |                   |                  |
| Low                  | 469(90.4)  | 50(9.6)   | 1                 | 1                |
| High                 | 52 (77.6)  | 15(22.4)  | 2.29(1.28- 4.10)  | 1.94(0.97-3.89)  |
| Treatment type       |            |           |                   |                  |
| SSG and PM           | 398(93.7)  | 27(6.3)   | 1                 | 1                |
| SSG                  | 69(83.1)   | 14(16.9)  | 2.16(1.07- 4.34)  | 0.81(0.37-1.78)  |

---

|          |          |          |                   |                 |
|----------|----------|----------|-------------------|-----------------|
| Ambisome | 54(69.2) | 24(30.8) | 7.82(4.39- 13.89) | 1.79(0.91-3.54) |
|----------|----------|----------|-------------------|-----------------|

---

272 SSG: Sodium stibogluconate, PM: Paromomycin, \* $p \leq 0.05$

273

274

275

276

277

## 278 **Discussion**

279 This study aimed to identify incidence of mortality and its predictors among adult VL patients  
280 on treatment. Accordingly, the overall incidence rate of mortality was 6.6 (95% CI 5.2 - 8.4)  
281 per 1000 person-days of observation, with most of deaths (60%) occurring within the first 10  
282 days of follow-up period, which requires the attention of health workers in these periods.

283 The proportion of death among VL patients in this study was 11.09 % (95% CI: 10.85% -  
284 13.6%), which is in line with a study conducted in Kaysay Abera Hospital(12.4%) [9]. This  
285 similarity might be due to the similarity in quality of care given for VL patients in these  
286 Hospitals, as these Hospitals use similar visceral leishmaniasis treatment guideline. Moreover,  
287 most of the patients in the current and earlier study were migrant workers as well as living in  
288 a rural area, which share similar economic level.

289 However, this finding is less than the finding in Tigray(18.5%)[10] as well as a cross-sectional  
290 study conducted among VL-HIV co-infected adults of Ethiopia(14.0%) [8]. The possible  
291 explanation for this difference might be differences in type of antileishmanial drugs used, in  
292 which patients in the earlier studies used only Sodium stibogluconate, which is often poorly  
293 tolerated, and toxic drug, to result in a significant incidence of serious adverse events such as  
294 toxicity of pancreas, liver, kidney and heart than other anti-leishmanial drugs [33]. Moreover,  
295 presence of comorbidity (VL-HIV co-infection), may increase the risk of death in the previous  
296 study compared to the current one.

297 In the contrary, the current finding is higher than the finding of Eastern Uganda (3.7%)[6],  
298 and Northwest Ethiopia (4.8 %) [7]. The reason for this discrepancy in the case of Eastern  
299 Uganda might be that only primary VL cases were included in the study, which may  
300 underestimate death rate, as death is more common among relapse cases than primary VL

301 patients[22,25]. In the case of earlier study of Ethiopia, VL patients who were taking  
302 Amphotericin B only were included, a drug with less toxicity and more tolerability than that  
303 took by participants of this study such as Sodium stibogluconate [12].

304 In the current study, the hazard of death among relapse VL patients was 3 times higher than  
305 that of primary VL patients. This finding is similar with the finding of two studies in Brazil  
306 [22,25]. This might be because of majority of the relapse cases in this study were HIV patients  
307 (64%). Since both VL and HIV attack the immune system of the body, they produce a profound  
308 immune deficiency state. The results and effect of this state is that VL speeds up the onset of  
309 full-blown AIDS and shortens the life expectancy of HIV-infected individuals, while HIV  
310 complicates management of VL. Visceral leishmaniasis lowers the total lymphocyte count  
311 (TLC) and Cluster of Differentiation four(CD4) count to a great extent by depressing the bone  
312 marrow and the splenic activities[34].

313 In our study, VL patients who had toxicity during treatment were 5.8 times more at risk of  
314 mortality than those patients who had no toxicity. This finding is similar with the finding of  
315 studies in Uganda, Somali and Ethiopia [6,11,12]. Since most anti-leishmanial drugs are toxic,  
316 development of drug toxicity such as arrhythmia, pancreatitis and others is common, which  
317 lead to poor compliance and further deterioration of the patient to cause death[15].

318 The hazard of death among VL patients with comorbidity was 2.3 times higher than those  
319 without comorbidity. This finding is in agreement with the finding of studies in Eastern  
320 Uganda, Brazil, India, and Ethiopia [6,22–24,29]. This might be due to the double burden  
321 associated with the comorbidity. Moreover, patients with concomitant disease/ comorbidity at  
322 admission had to take more drugs so they might have more risk of toxicity and drug-drug  
323 interaction, which causes severe form of the disease to end up with death of the patient.

324 The hazard of death among VL patients who had nasal bleeding was 2.6 times higher than  
325 those patients who didn't have nasal bleeding. This result is consistent with the result of a study  
326 in Northern Ethiopia(Tigray), America and Sudan[5,10,21]. Nasal bleeding among VL patients  
327 occurs probably due to a combination of deficient clotting factor and platelet count, which  
328 increases the risk of death among VL patients[35].

329 In this study, VL patients who had jaundice at admission were 2.9 times more at risk of death  
330 than their counterparts. The finding of this study is similar with studies conducted in Gedaref  
331 state of Sudan, America and Brazil [5,18–21,26]. This could be possibly due to, jaundice  
332 (usually the sign of liver dysfunction) causes decreased plasma protein synthesis, inability to  
333 detoxify drugs and impairment of other liver functions, to cause an increased risk of death.

334 Those patients who were bedridden had 3.2 times increased risk of death compared to  
335 ambulatory patients. The current finding is similar with the finding of a study in Kaysay Abera  
336 Hospital [9]. This might be due to majority of bedridden patients (64%) in this study had  
337 concomitant diseases such as HIV/AIDS, tuberculosis and pneumonia, which ultimately  
338 increases the risk of death compared to ambulatory patients. This explanation is supported by  
339 studies conducted in Brazil, which states that most severely ill patients have an increased risk  
340 of concomitant diseases that can increase their risk of death [18,36]. Furthermore, severely ill  
341 patients usually do not respond to their medication easily and do not take adequate food as  
342 well. As limitation, since the study is retrospective, data about some variables such as blood  
343 glucose level, serum albumin level and income of the patient was not collected. So we can't  
344 assess the effect of these variables on the incidence of mortality.

345 **Conclusion**

346 The incidence of mortality among VL patients on treatment was high. The risk of death were  
347 higher among VL patients with concomitant disease, relapse, treatment toxicity, nasal  
348 bleeding, jaundice and those who were bedridden at admission, which requires greater  
349 attention for those risk groups.

350 **Recommendations**

351 Health professionals and Hospital managers better to strictly follow and treat VL patients who  
352 had toxicity during treatment, nasal bleeding, jaundice, relapse and bedridden. They also give  
353 high emphasis for VL patients with other comorbidities such as pneumonia, HIV/AIDS, and  
354 tuberculosis. Conducting prospective cohort study by including the above missed variables is  
355 also recommended by the next researchers.

356 **Acknowledgments**

357 I want to thank University of Gondar for giving this chance to conduct the study. My honest  
358 gratitude also goes to my friends for their valuable support and help. I want to thank my data  
359 collectors and chart room workers.

360 **Author Contributions**

361 Conceptualization: Yigizie Yeshaw, Adino Tesfahun, Solomon Gedlu

362 Data cu ration: Yigizie Yeshaw, Adino Tesfahun, Solomon Gedlu

363 Formal analysis: Yigizie Yeshaw

364 Investigation: Yigizie Yeshaw, Adino Tesfahun, Solomon Gedlu

365 Methodology: Yigizie Yeshaw, Adino Tesfahun, Solomon Gedlu

366 Resources: Yigizie Yeshaw

367 Validation: Yigizie Yeshaw, Solomon Gedlu, Adino Tesfahun

368 Writing – original draft: Yigizie Yeshaw

369 Writing – review & editing: Solomon Gedlu, Adino Tesfahun

370 **Abbreviations/Acronyms**

371 AHR Adjusted Hazard Ratio

372 AIDS Acquired Immune Deficiency Syndrome

373 BMI Body Mass Index

374 CBC Complete Blood Count

375 HIV Human Immunodeficiency Virus

376 LRTC Leishmaniasis Research and Treatment Center

377 PM Paromomycin

378 RBC Red Blood Cell

379 SSG Sodium stibogluconate

380 TOC Test of Cure

381 UoG University of Gondar

382 VL Visceral Leishmaniasis

383 WBC White Blood Cell

384

386 **9. References**

- 387 1. Biologics I for international cooperation in animal. Leishmaniasis Leishmaniasis (   
388 cutaneous and visceral ). Cent food Secur public Heal. 2017;1–18.
- 389 2. WHO FR. Book Review: Working to Overcome the Global Impact of Neglected   
390 Tropical Diseases. Perspect Public Health. 2012;132(4):192–192.
- 391 3. Marinkelle CJ. The control of leishmaniasis. Bull World Health Organ.   
392 2010;58(6):807–18.
- 393 4. Alvar J, Vélez ID, Bern C, Herrero M, Desjeux P, Cano J, et al. Leishmaniasis   
394 worldwide and global estimates of its incidence. PLoS One. 2012;7(5):1–12.
- 395 5. Mueller YK, Nackers F, Ahmed KA, Boelaert M, Djoumessi JC, Eltigani R, et al.   
396 Burden of Visceral Leishmaniasis in Villages of Eastern Gedaref State, Sudan: An   
397 Exhaustive Cross-Sectional Survey. PLoS Negl Trop Dis. 2012;6(11):1–6.
- 398 6. Mueller Y, Mbulamberi DB, Odermatt P, Hoffmann A, Loutan L, Chappuis F. Risk   
399 factors for in-hospital mortality of visceral leishmaniasis patients in eastern Uganda.   
400 Trop Med Int Heal. 2009;14(8):910–7.
- 401 7. Tamiru A, Tigabu B, Yifru S, Diro E, Hailu A. Safety and efficacy of liposomal   
402 amphotericin B for treatment of complicated visceral leishmaniasis in patients without   
403 HIV, North-West Ethiopia. BMC Infect Dis [Internet]. 2016;16(1):1–7. Available from:   
404 <http://dx.doi.org/10.1186/s12879-016-1746-1>
- 405 8. Diro E, Lynen L, Mohammed R, Boelaert M, Hailu A, van Griensven J. High   
406 Parasitological Failure Rate of Visceral Leishmaniasis to Sodium Stibogluconate among   
407 HIV Co-infected Adults in Ethiopia. PLoS Negl Trop Dis. 2014;8(5):14–7.
- 408 9. Welay GM, Alene KA, Dachew BA. Visceral leishmaniasis treatment outcome and its



- 409 determinants in northwest Ethiopia. *Epidemiol Health* [Internet]. 2016;39:1–6.  
410 Available from: <http://www.e-epih.org/journal/view.php?doi=10.4178/epih.e2017001>
- 411 10. Lyons S, Veecken H, Long J. Visceral leishmaniasis and HIV in Tigray, Ethiopia. *Trop*  
412 *Med Int Heal*. 2003;8(8):733–9.
- 413 11. Director H promotion and D prevention DG. Guidline for diagnosis, treatment and  
414 prevention of leishmaniasis in Ethiopia. 2017;91:1–88.
- 415 12. Government SF. Guidelines for diagnosis, treatment and prevention of visceral  
416 leishmaniasis in Somalia 2012. 2012;4–82.
- 417 13. Alvar J, Vélez ID, Bern C, Herrero M, Desjeux P, Cano J, et al. Leishmaniasis  
418 worldwide and global estimates of its incidence. *PLoS One*. 2012;7(5):1–12.
- 419 14. Gadisa E, Tsegaw T, Abera A, Elnaiem DE, Den Boer M, Aseffa A, et al. Eco-  
420 epidemiology of visceral leishmaniasis in Ethiopia. *BMC* [Internet]. 2015;8(1):1–10.  
421 Available from: <http://dx.doi.org/10.1186/s13071-015-0987-y>
- 422 15. Singh P, Kumar M. Current treatment of visceral leishmaniasis (Kala-azar): an  
423 overview. *Int J Res Med Sci* [Internet]. 2014;2(3):810. Available from:  
424 <http://www.msjonline.org/?mno=157405>
- 425 16. Okwor I, Uzonna J. Review Article Social and Economic Burden of Human  
426 Leishmaniasis. *Am Soc Trop Med Hyg*. 2016;94(3):489–93.
- 427 17. Collin S, Davidson R, Ritmeijer K, Keus K, Melaku Y, Kipngetich S, et al. Conflict and  
428 Kala-Azar: Determinants of Adverse Outcomes of Kala-Azar among Patients in  
429 Southern Sudan. *Clin Infect Dis* [Internet]. 2004;38(5):612–9. Available from:  
430 <https://academic.oup.com/cid/article-lookup/doi/10.1086/381203>
- 431 18. Queiroz A De, Cavalcanti NV. Risk Factors for Death in Children with Visceral

- 432 Leishmaniasis. *PLoS Negl Trop Dis*. 2010;4(11):1–5.
- 433 19. Gerais M, Sérgio A, De AC, Juniorii CT, Rabelloiii A. *Revista da Sociedade Brasileira*  
434 *de Medicina Tropical* Factors of poor prognosis of visceral leishmaniasis among  
435 children under 12 years of age . A retrospective monocentric study in Belo.  
436 2013;46(1):1–7.
- 437 20. Costa DL, Rocha RL, de Brito Ferreira Chaves E, de Vasconcelos Batista VG, Costa  
438 HL, Nery Costa CH. Predicting death from kala-azar: Construction, development, and  
439 validation of a score set and accompanying software. *Rev Soc Bras Med Trop*.  
440 2016;49(6):728–40.
- 441 21. Belo VS, Struchiner CJ, Barbosa DS, Nascimento BWL, Horta MAP, da Silva ES, et al.  
442 Risk Factors for Adverse Prognosis and Death in American Visceral Leishmaniasis: A  
443 Meta-analysis. *PLoS Negl Trop Dis*. 2014;8(7):1–9.
- 444 22. Druzian AF, Souza AS d., Campos DN d., Croda J, Higa MG, Dorval MEC, et al. Risk  
445 factors for death from visceral leishmaniasis in an urban area of Brazil. *PLoS Negl Trop*  
446 *Dis*. 2015;9(8):1–11.
- 447 23. Alemayehu M., Wubshet M. MN. Magnitude of visceral leishmaniasis and poor  
448 treatment outcome among HIV patients: Meta-analysis and systematic review.  
449 *HIV/AIDS - Res Palliat Care* [Internet]. 2016;8:75–81. Available from:  
450 [http://www.embase.com/search/results?subaction=viewrecord&from=export&id=L61](http://www.embase.com/search/results?subaction=viewrecord&from=export&id=L610074224%0Ahttp://dx.doi.org/10.2147/HIV.S96883)  
451 [0074224%0Ahttp://dx.doi.org/10.2147/HIV.S96883](http://dx.doi.org/10.2147/HIV.S96883)
- 452 24. Gebreyohannes EA, Bhagvathula AS, Abegaz TM, Seid MA. Treatment outcomes of  
453 visceral leishmaniasis in Ethiopia from 2001 to 2017: A systematic review and meta-  
454 analysis. *Infect Dis Poverty*. 2018;7(1):1–9.

- 455 25. Assumpção Mourão MV, Toledo A, Gomes LI, Freire VV, Rabello A. Parasite load and  
456 risk factors for poor outcome among children with visceral leishmaniasis. A cohort  
457 study in Belo Horizonte, Brazil, 2010-2011. *Mem Inst Oswaldo Cruz.* 2014;109(2):147–  
458 53.
- 459 26. de Araújo VEM, Morais MHF, Reis IA, Rabello A, Carneiro M. Early clinical  
460 manifestations associated with death from visceral leishmaniasis. *PLoS Negl Trop Dis.*  
461 2012;6(2):1–10.
- 462 27. Verma S, Kumar R, Katara GK, Singh LC, Negi NS, Ramesh V, et al. Quantification of  
463 parasite load in clinical samples of leishmaniasis patients: Il-10 level correlates with  
464 parasite load in visceral leishmaniasis. *PLoS One.* 2010;5(4).
- 465 28. Soares MRA, Ishikawa EAY, Silva JM, Zacarias DA, Costa DL, Costa CHN. Bone  
466 Marrow Parasite Burden among Patients with New World Kala-Azar Is Associated with  
467 Disease Severity. *Am J Trop Med Hyg.* 2014;90(4):621–6.
- 468 29. Das A, Karthick M, Dwivedi S, Banerjee I, Mahapatra T. Epidemiologic Correlates of  
469 Mortality among Symptomatic Visceral Leishmaniasis Cases : Findings from Situation  
470 Assessment in High Endemic Foci in India. *PLoS Negl Trop Dis.* 2016;DOI:10.137:1–  
471 12.
- 472 30. Desta A, Shiferaw S, Kassa A, Shimelis T, Dires S. *Leishmaniasis.* 2005;1–99.
- 473 31. Aderie EM, Diro E, Zachariah R, da Fonseca MS, Abongomera C, Dolamo BL, et al.  
474 Does timing of antiretroviral treatment influence treatment outcomes of visceral  
475 leishmaniasis in Northwest Ethiopia? *Trans R Soc Trop Med Hyg.* 2017;111(3):107–  
476 16.
- 477 32. Abongomera C, Diro E, Vogt F, Tsoumanis A, Mekonnen Z, Admassu H, et al. The

- 478 Risk and Predictors of Visceral Leishmaniasis Relapse in Human Immunodeficiency  
479 Virus-Coinfected Patients in Ethiopia: A Retrospective Cohort Study. *Clin Infect Dis.*  
480 2017;65(10):1703–10.
- 481 33. Croft SL, Olliaro P. Leishmaniasis chemotherapy — challenges and opportunities. *Clin*  
482 *Microbiol Infect.* 2011;17:1478–83.
- 483 34. Ministry of Health. Diagnosis and Treatment of Visceral Leishmaniasis ( Kal-azar ) in  
484 Kenya. 2017;2–77.
- 485 35. Sigdel B, Bhandary S, Rijal S. Epistaxis in Visceral Leishmaniasis with Hematological  
486 Correlation. *Int J Otolaryngol.* 2012;2012:10–3.
- 487 36. Werneck GL, Batista MSA, Gomes JRB, Costa DL, Costa CHN. Prognostic Factors for  
488 Death from Visceral Leishmaniasis in Teresina , Brazil. 2003;31(3)(3):174–5.
- 489

bioRxiv preprint doi: <https://doi.org/10.1101/723379>; this version posted August 2, 2019. The copyright holder for this preprint (which was not certified by peer review) is the author/funder. This article is a US Government work. It is not subject to copyright under 17 USC 105 and is also made available for use under a CC0 license.

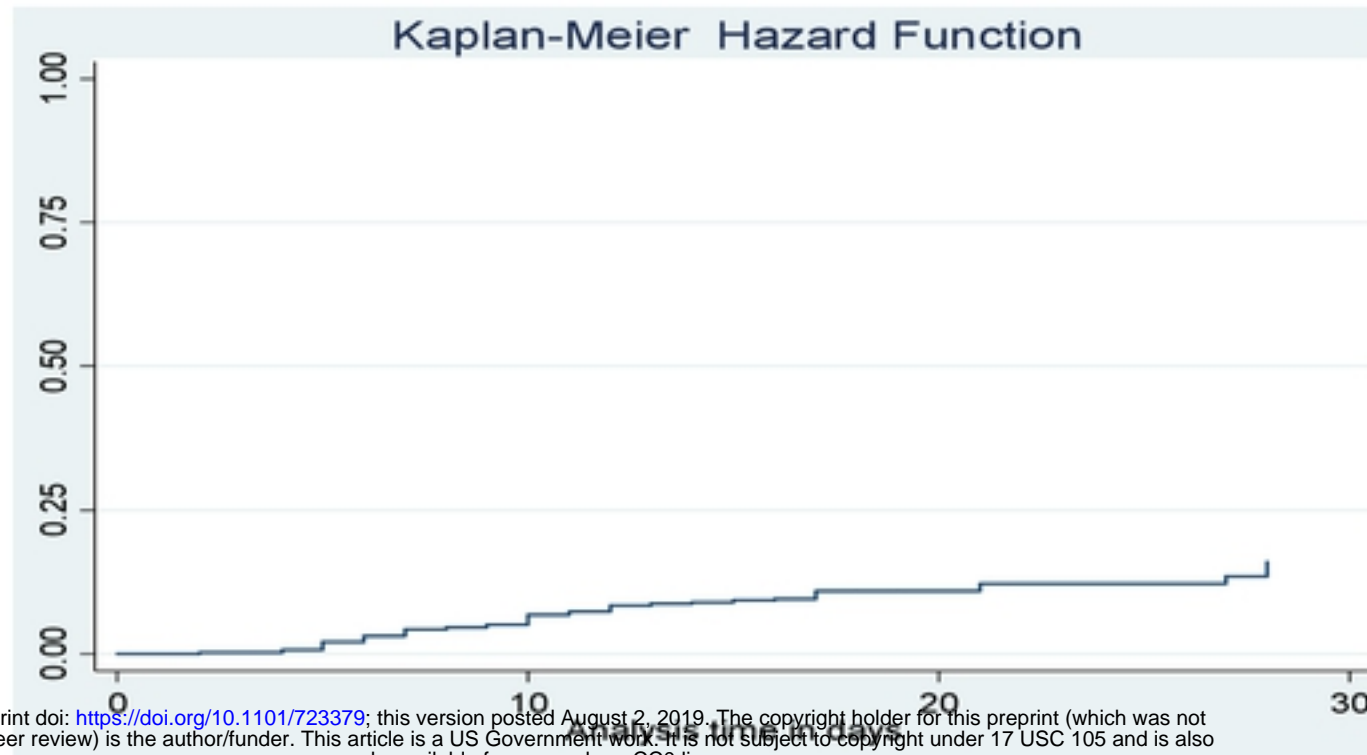

**Figure 1:** Cumulative hazard function of VL patients at UoG Hospital, 2019

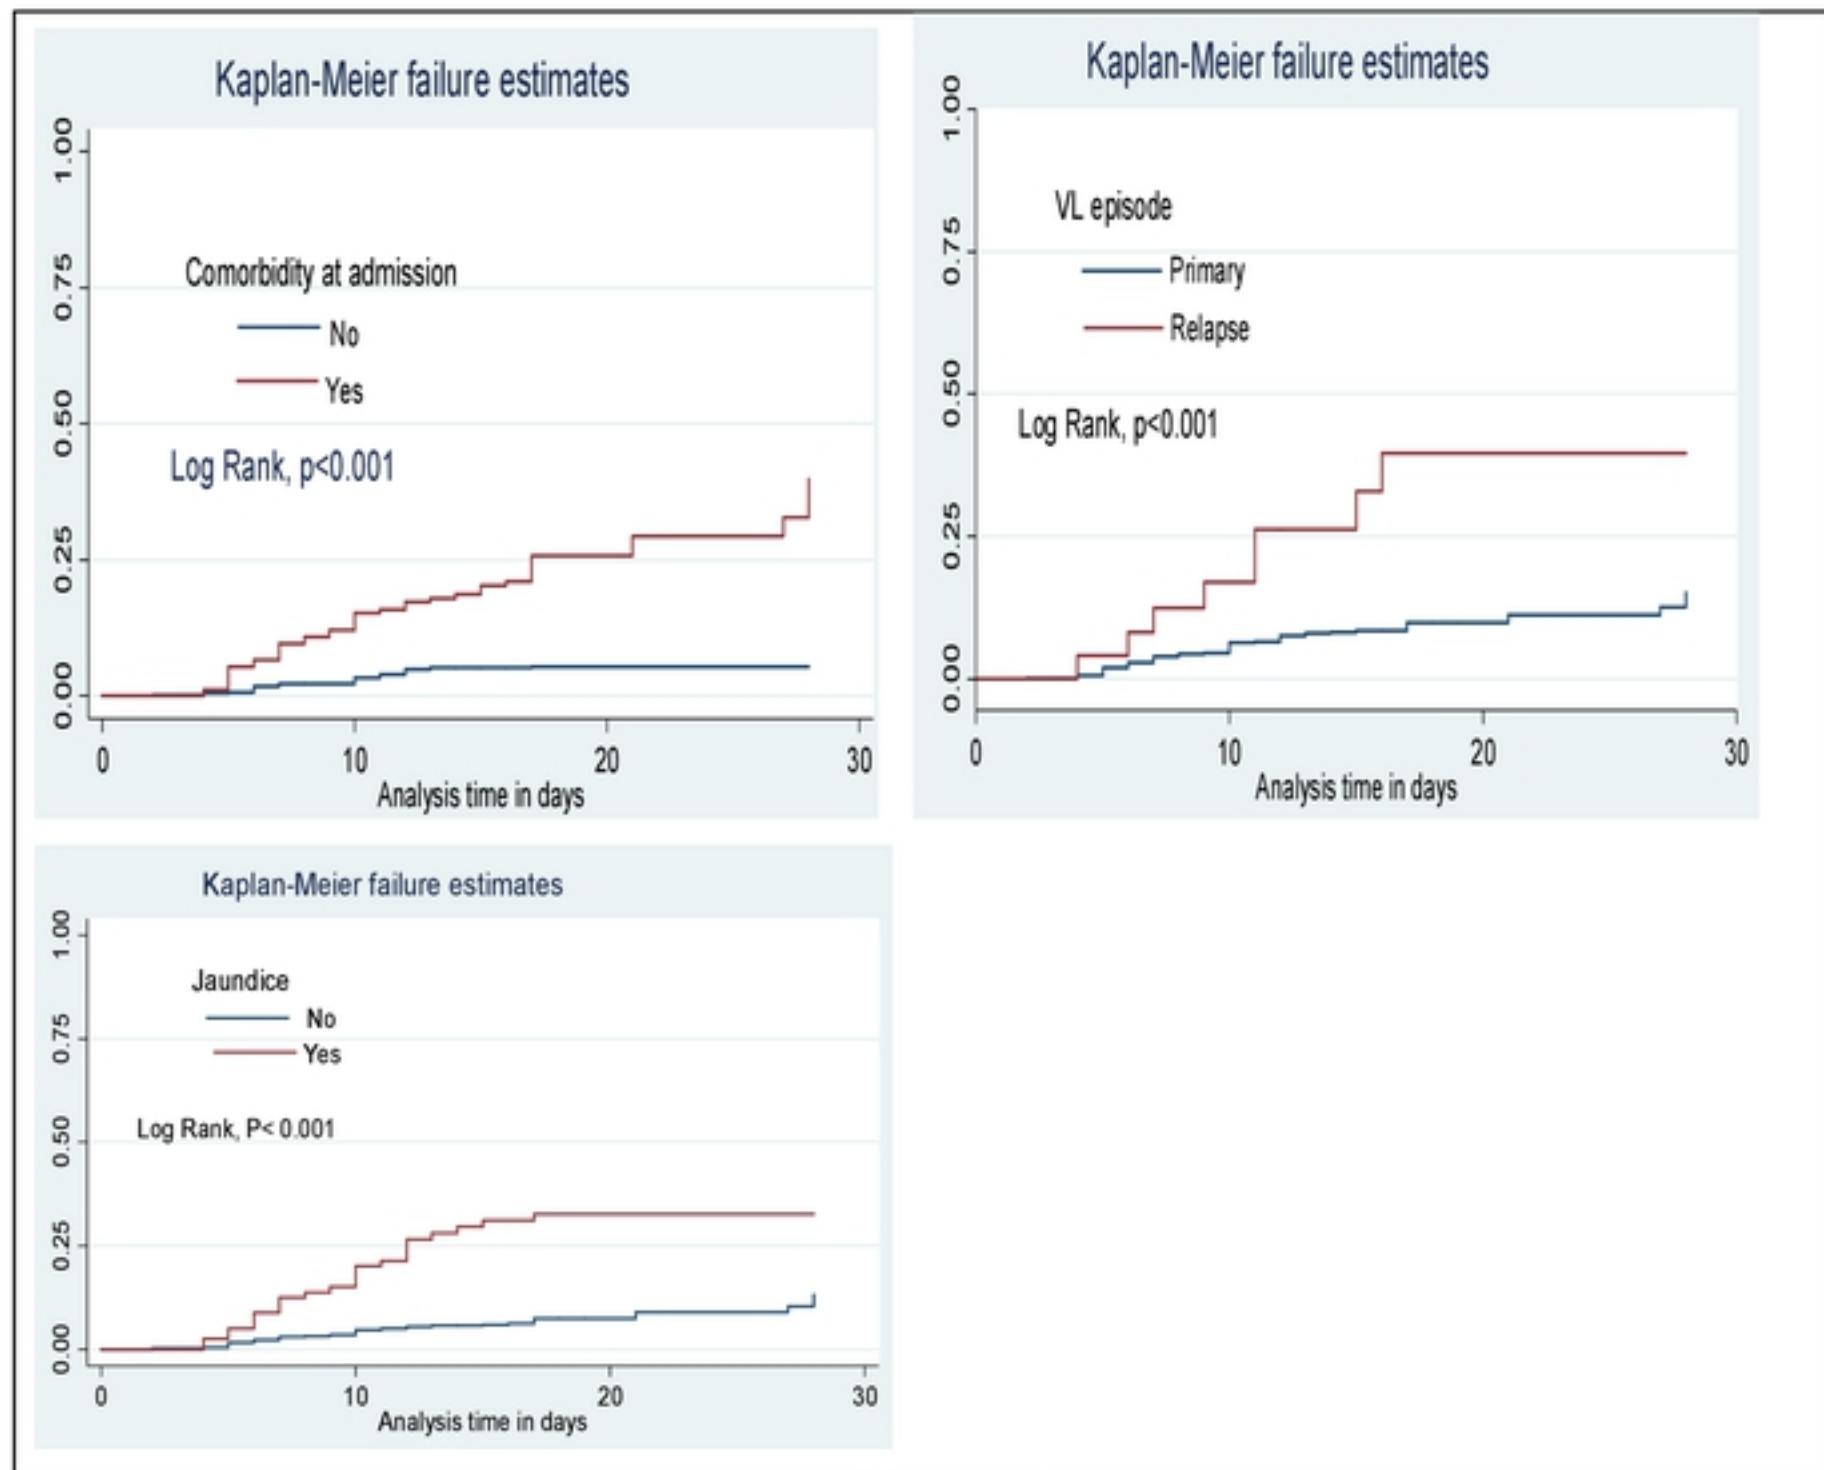

**Figure 2:** Kaplan Meier failure curves and log rank test for some of the variables among the cohort of VL patients at UoG Hospital, 2019

bioRxiv preprint doi: <https://doi.org/10.1101/723379>; this version posted August 2, 2019. The copyright holder for this preprint (which was not certified by peer review) is the author/funder. This article is a US Government work. It is not subject to copyright under 17 USC 105 and is also made available for use under a CC0 license.

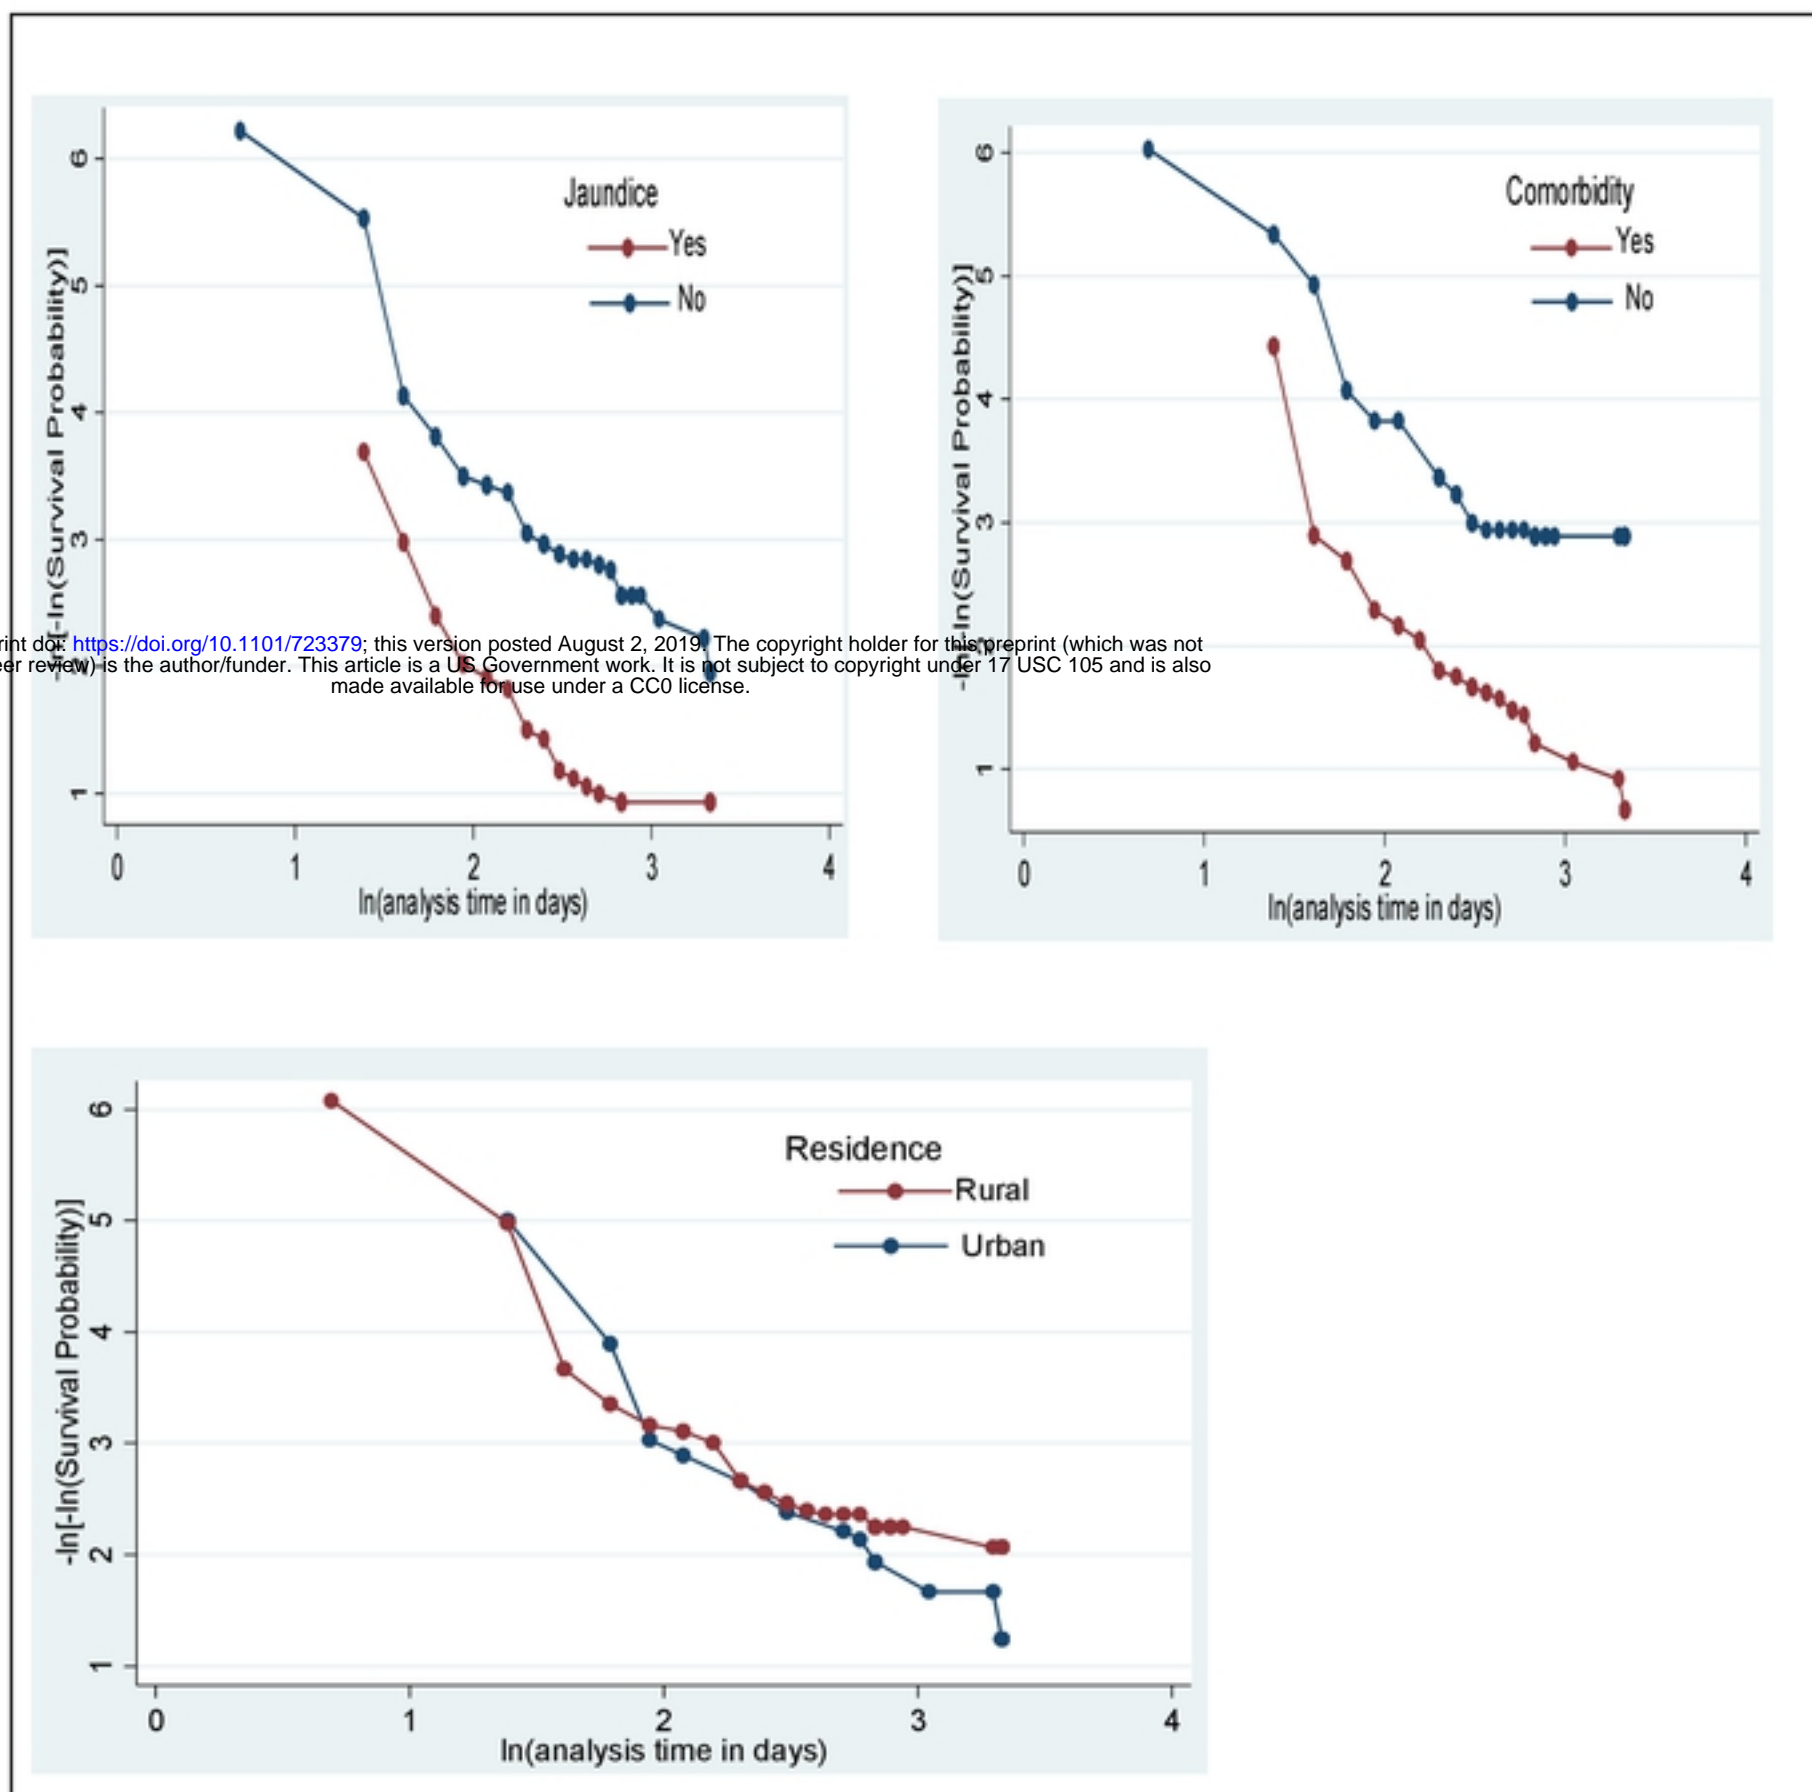

**Figure 3:** Proportional hazard plot for some of the variables among the cohort of VL patients at UoG Hospital, 2019
